# Supplementary material
Source: publisher figshare collection journal article supplement (https://acs.figshare.com/ndownloader/files/7791421)
Supplement: Supplementary file 1 [file 7791421]

# Identification of Pyridinium with Three Indole Moieties as an Antimicrobial Agent

*Masahiro Okada,<sup>†,‡,\*</sup> Tomotoshi Sugita,<sup>†,‡</sup> Chin Piow Wong,<sup>†</sup> Toshiyuki Wakimoto,<sup>†,§</sup> Ikuro Abe <sup>†,\*</sup>*

<sup>†</sup> Graduate School of Pharmaceutical Sciences, The University of Tokyo,

Bunkyo-ku, Tokyo 113-0033, Japan

## Table of Contents

|                                                                                                  |    |
|--------------------------------------------------------------------------------------------------|----|
| NMR, IR, and UV spectra of natural tricepyridinium acetate ( <b>1a</b> ) ( <b>Figure S1-S4</b> ) | 2  |
| Synthetic protocols and NMR spectra ( <b>Scheme S1, Figure S5-S27</b> )                          | 4  |
| Plausible biosynthetic pathway ( <b>Scheme S2</b> )                                              | 20 |
| Cytotoxic activity ( <b>Table S1</b> )                                                           | 21 |

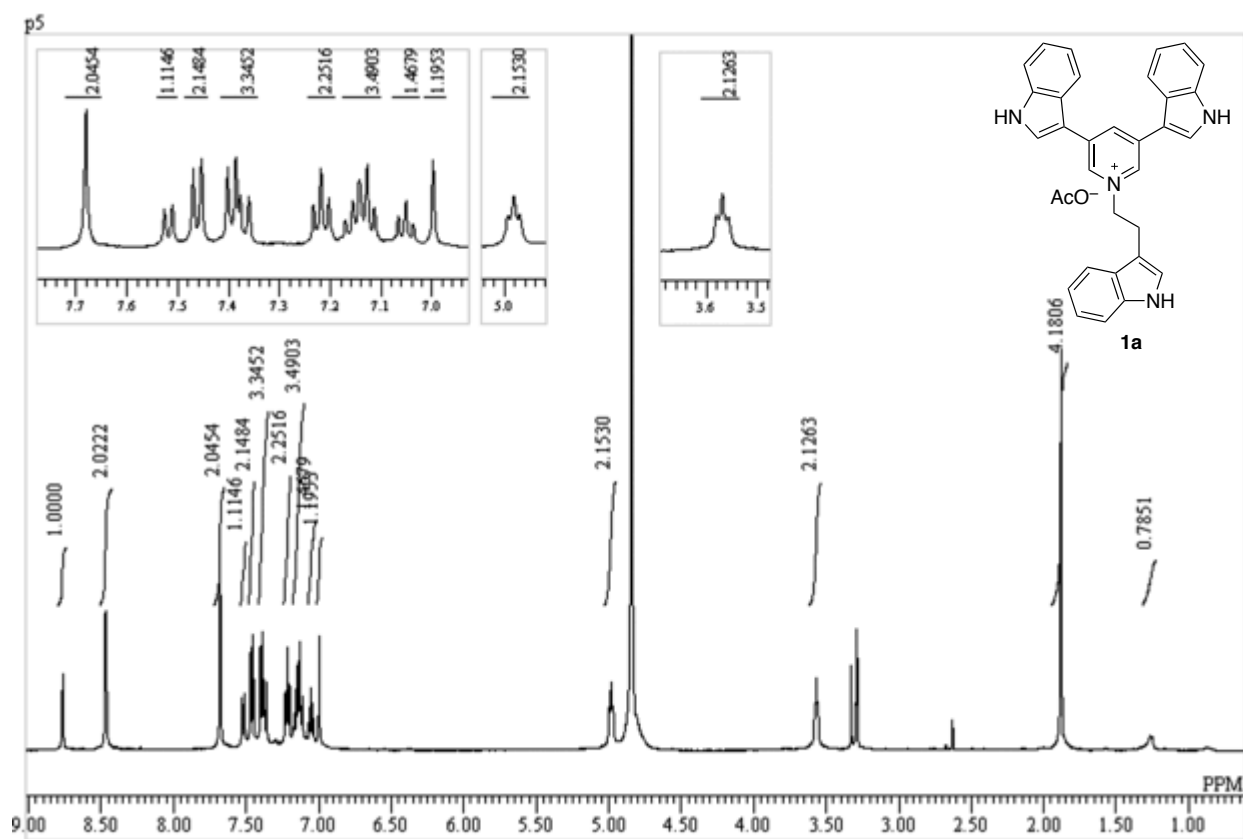

**Figure S1.**  $^1\text{H}$  NMR (500 MHz,  $\text{CD}_3\text{OD}$ ) spectrum of **1a**.

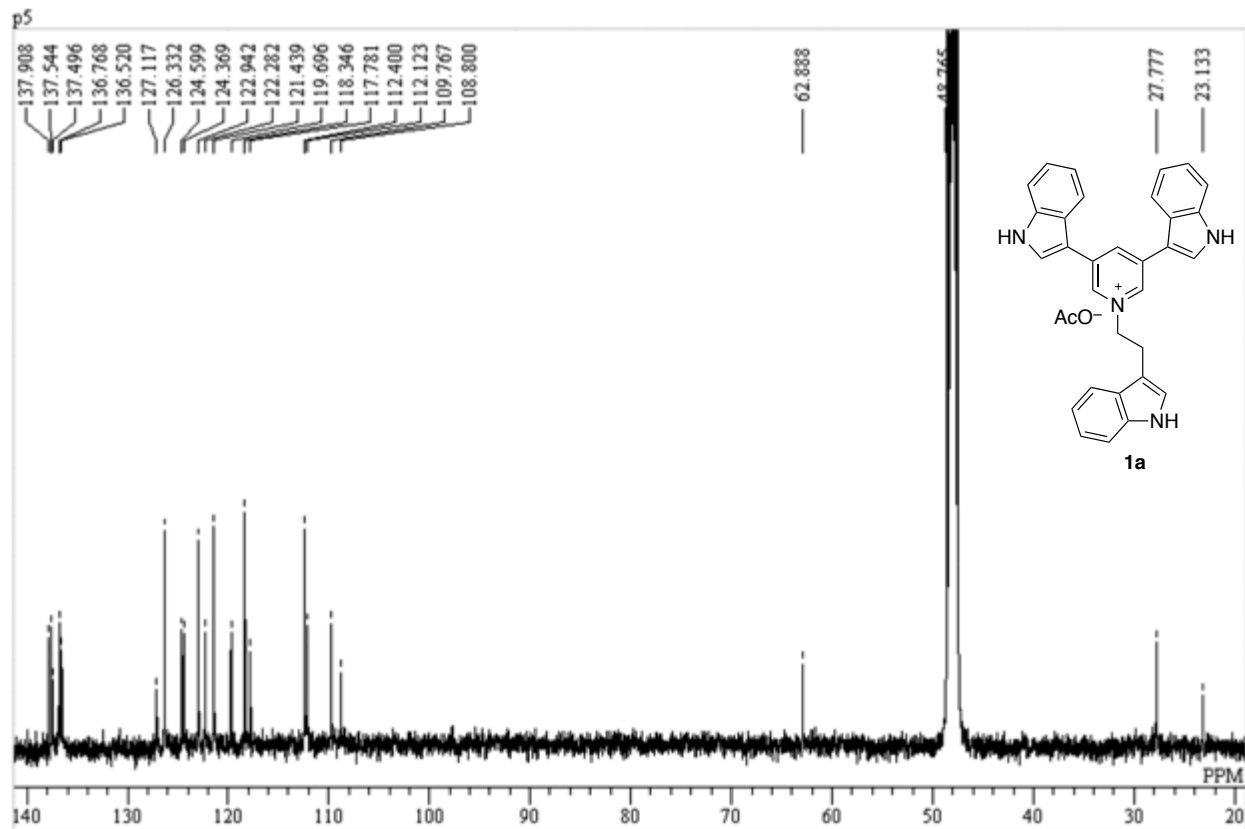

**Figure S2.**  $^{13}\text{C}$  NMR (125 MHz,  $\text{CD}_3\text{OD}$ ) spectrum of **1a**.

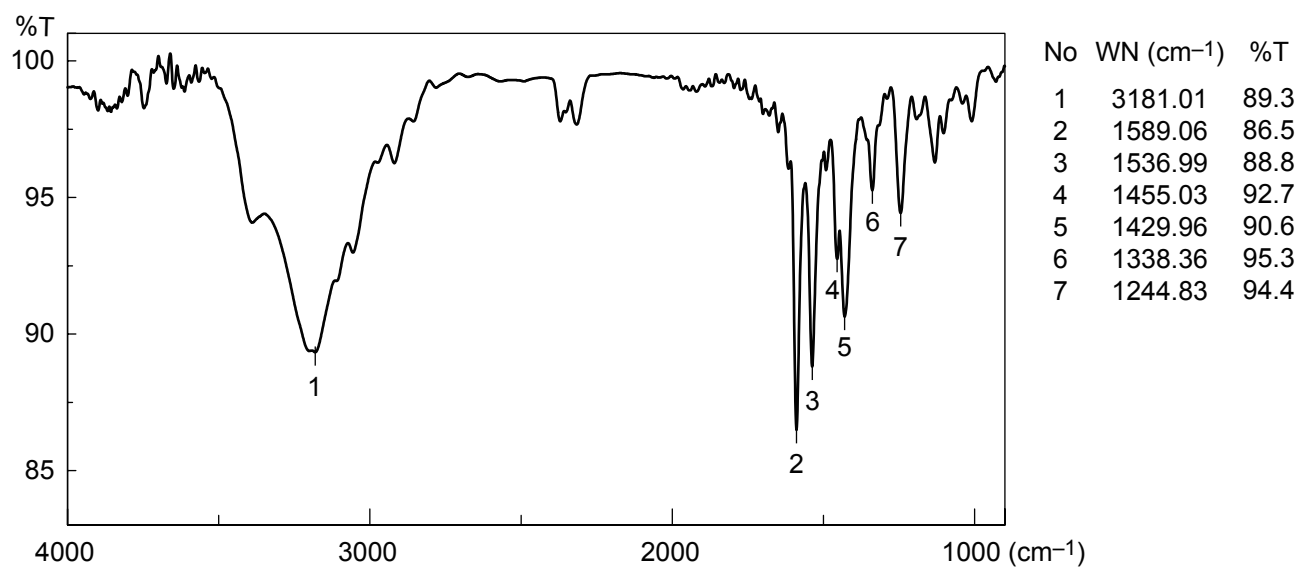

**Figure S3.** IR (CaF<sub>2</sub>) spectrum of **1a**.

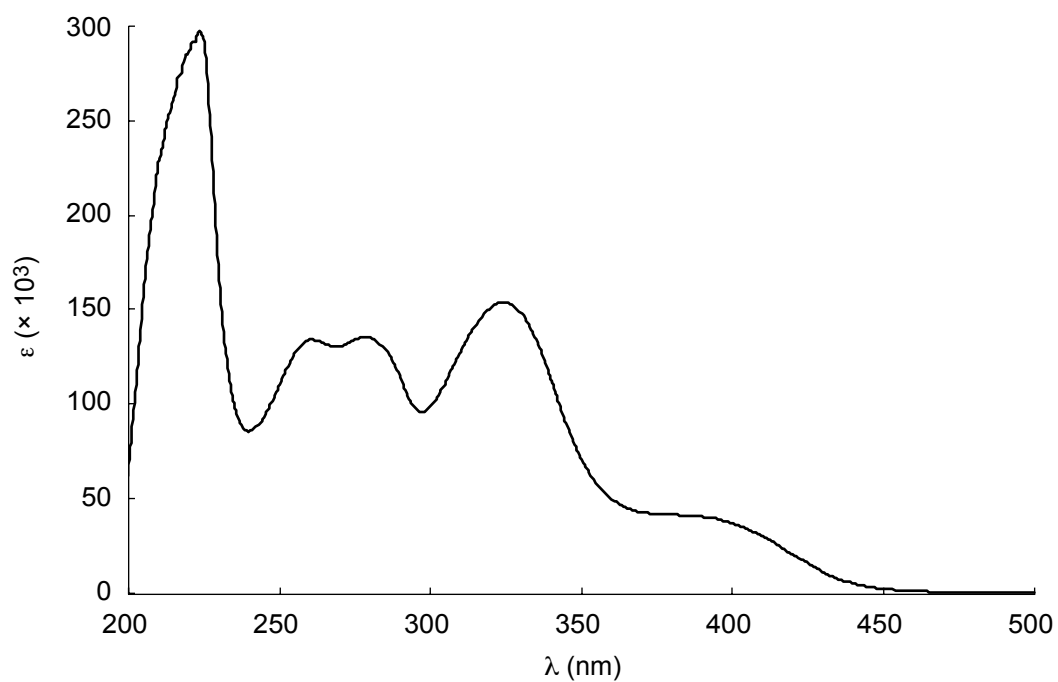

**Figure S4.** UV (MeOH) spectrum of **1a**.

**A**

**5**

$\xrightarrow[\text{CH}_3\text{CN}, 50^\circ\text{C}, 19\text{ h}, 55\%]{\text{EtBr}}$

**6b**

**B**

**11**

$\xrightarrow[\text{DMSO}, 90^\circ\text{C}, 2.5\text{ h}, 74\%]{\text{PdCl}_2(\text{dppf})_2, \text{K}_2\text{CO}_3}$

**12**

$\xrightarrow[\text{CH}_2\text{Cl}_2, 0^\circ\text{C}, 1\text{ h}, 93\%]{\text{TFA}}$

**8**

$\xrightarrow[1,4\text{-dioxane}, 90^\circ\text{C}, 24\text{ h}, 24\%]{\text{2-(2-bromoethyl)-1H-indole}}$

**7b**

**C**

**R = H or Br**

$\xrightarrow[1,4\text{-dioxane}, 90^\circ\text{C}]{\text{2-(2-bromoethyl)-1H-indole}}$

**2 h, quant (R = H)**

**47 h, 35% (R = Br)**

**R = H (9b)**

**R = Br (10b)**

### Synthesis of 1-Ethyl-3,5-di(3-indolyl)pyridinium Bromide (6b).

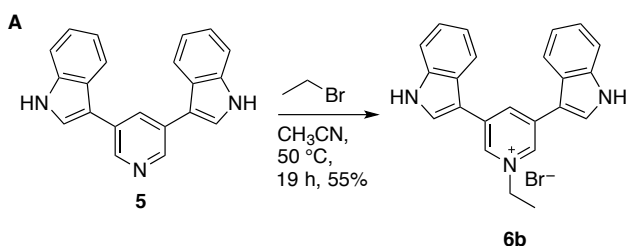

4

### Synthesis of 3-[3-(1-Boc)-indolyl]pyridine (**12**).

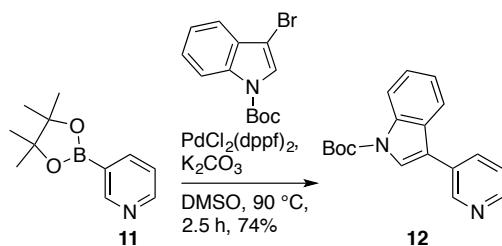

To a solution of 3-(4,4,5,5-tetramethyl-1,3,2-dioxaborolan-2-yl)pyridine **11** (214 mg, 1.04 mmol) in DMSO (10 mL), 1-Boc-3-bromoindole (370 mg, 1.25 mmol),  $\text{K}_2\text{CO}_3$  (725 mg, 5.25 mmol), and  $\text{PdCl}_2(\text{dppf})_2$  (58.0 mg, 71.0  $\mu\text{mol}$ ) were added. After the mixture was stirred at  $90\text{ }^\circ\text{C}$  for 2.5 h, it was quenched with water and filtered through Celite to remove the palladium catalyst. The filtrate was extracted with EtOAc, washed with saturated aqueous NaCl, dried over  $\text{Na}_2\text{SO}_4$ , and evaporated. The residue was purified by silica gel column chromatography (hexane/acetone = 15/1 to 4/1) to give **12** (227 mg, 0.771 mmol, 74%) as a white powder.  $^1\text{H}$  NMR (500 MHz,  $\text{CDCl}_3$ ):  $\delta_{\text{H}}$  8.90 (1H, s), 8.59 (1H, d,  $J = 5.1$  Hz), 8.23 (1H, brs), 7.97-7.85 (1H, m), 7.75 (2H, d,  $J = 8.5$  Hz), 7.43-7.27 (3H, m), 1.69 (9H, s);  $^{13}\text{C}$  NMR (125 MHz,  $\text{CDCl}_3$ ):  $\delta_{\text{C}}$  149.6, 149.0, 148.4, 136.0, 135.1, 130.0, 128.6, 125.0, 123.7, 123.5, 123.3, 119.6, 118.7, 115.7, 84.3, 28.3; HRESIMS:  $m/z$  295.1436  $[\text{M}+\text{H}]^+$  (calcd for  $\text{C}_{18}\text{H}_{19}\text{N}_2\text{O}_2$ , 295.1441).

### Synthesis of 3-(3-Indolyl)pyridine (**8**).

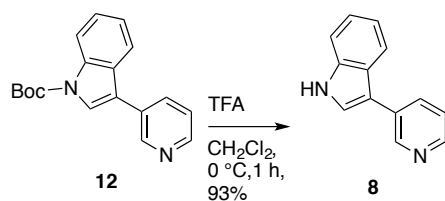

To a solution of **12** (215 mg, 0.730 mmol) in  $\text{CH}_2\text{Cl}_2$  (2.0 mL), TFA (6.0 mL) was slowly added at  $0\text{ }^\circ\text{C}$ , and the mixture was stirred at  $0\text{ }^\circ\text{C}$  for 1 h. The reaction mixture was quenched and basified with 1 M aqueous KOH. The mixture was extracted with EtOAc, washed with saturated aqueous NaCl, dried over  $\text{Na}_2\text{SO}_4$ , and evaporated. The residue was purified by silica gel column chromatography (hexane/acetone = 6/1 to 3/1) to give **8** (132 mg, 0.680 mmol, 93%) as a yellow powder.  $^1\text{H}$  NMR (500 MHz,  $\text{CDCl}_3$ ):  $\delta_{\text{H}}$  9.56 (1H, s), 8.95 (1H, m), 8.55 (1H, d,  $J = 4.6$  Hz), 7.96 (2H, m), 7.60-7.18 (4H, m);  $^{13}\text{C}$  NMR (125 MHz,  $\text{CDCl}_3$ ):  $\delta_{\text{C}}$  148.3, 146.8, 137.0, 134.7, 132.1, 125.6, 124.0, 122.8, 122.8, 120.7, 119.3, 114.3, 112.0; HRESIMS  $m/z$  195.0919  $[\text{M}+\text{H}]^+$  (calcd for  $\text{C}_{13}\text{H}_{11}\text{N}_2$ , 195.0917).

### Synthesis of 1-[2-(3-Indolyl)ethyl]-3-(3-indolyl)pyridinium Bromide (**7b**).

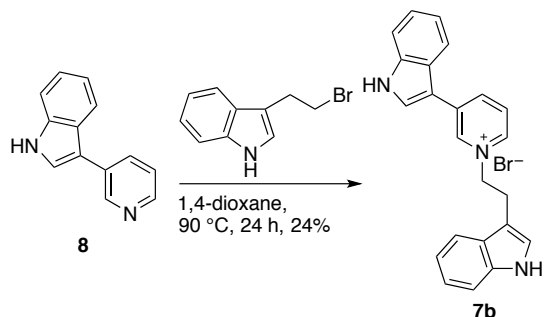

To a solution of **8** (67.0 mg, 0.345 mmol) in 1,4-dioxane (0.70 mL), 3-(2-bromoethyl)indole (114 mg, 0.509 mmol) was added, and the mixture was stirred at 90 °C for 24 h. After the mixture was quenched with H<sub>2</sub>O, EtOAc was added, and the mixture was extracted with H<sub>2</sub>O. The aqueous layer was evaporated to give **7b** (34.0 mg, 81.3 μmol, 24%) as a yellow solid, which was used without any further purification. <sup>1</sup>H NMR (500 MHz, CD<sub>3</sub>OD): δ<sub>H</sub> 8.63 (1H, d, *J* = 8.6 Hz), 8.50 (1H, d, *J* = 6.3 Hz), 8.43 (s, 1H), 7.89 (1H, dd, *J* = 8.0, 5.7 Hz), 7.47-7.42 (2H, m), 7.40 (1H, d, *J* = 8.0 Hz), 7.33 (1H, d, *J* = 8.6 Hz), 7.20-7.09 (3H, m), 7.07-6.99 (2H, m), 6.93 (1H, s), 4.92 (2H, t, *J* = 6.0 Hz), 3.49 (2H, t, *J* = 6.0 Hz); <sup>13</sup>C NMR (125 MHz, CD<sub>3</sub>OD): δ<sub>C</sub> 140.7, 140.5, 139.2, 137.6, 137.4, 137.1, 137.0, 127.6, 126.6, 126.0, 123.9, 122.5, 121.8, 121.1, 119.2, 117.9, 117.3, 111.9, 111.6, 108.8, 108.2, 62.4, 27.2; HRESIMS *m/z* 338.1658 [*M*]<sup>+</sup> (calcd for C<sub>23</sub>H<sub>20</sub>N<sub>3</sub>, 338.1652).

### Synthesis of 1-[2-(3-Indolyl)ethyl]pyridinium Bromide (**9b**).

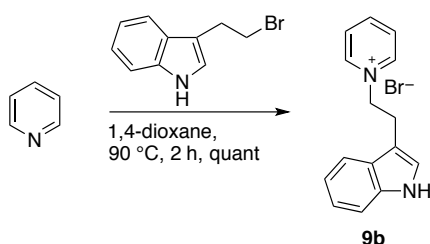

Pyridine (2 mL) was added to 3-(2-bromoethyl)indole (104 mg, 0.464 mmol), and the mixture was stirred at 90 °C for 2 h. After the mixture was quenched with H<sub>2</sub>O, EtOAc was added, and the mixture was extracted with H<sub>2</sub>O. The aqueous layer was evaporated to give **7** (145 mg, 0.478 mmol, quant.) as a yellow solid, which was used without any further purification. <sup>1</sup>H NMR (500 MHz, CD<sub>3</sub>OD): δ<sub>H</sub> 8.56 (2H, t, *J* = 5.7 Hz), 8.37 (1H, q, *J* = 7.2 Hz), 7.81 (2H, d, *J* = 6.8 Hz), 7.39-7.21 (2H, m), 7.07 (1H, q, *J* = 7.2 Hz), 7.00-6.84 (2H, m), 3.40 (2H, q, *J* = 6.4 Hz); <sup>13</sup>C-NMR (125 MHz, CD<sub>3</sub>OD): δ<sub>C</sub> 145.2, 144.4, 136.7, 127.6, 126.7, 123.8, 121.6, 119.1, 117.3, 111.4, 108.0, 62.5, 27.0; HRESIMS *m/z* 223.1232 [*M*]<sup>+</sup> (calcd for C<sub>15</sub>H<sub>15</sub>N<sub>2</sub>, 223.1230).

### Synthesis of 3,5-Dibromo-1-[2-(3-indolyl)ethyl]pyridinium Bromide (**10b**).

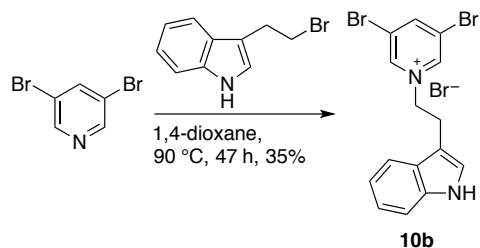

To a solution 3,5-dibromopyridine (290 mg, 1.22 mmol) in 1,4-dioxane (1.50 mL), 3-(2-bromoethyl)indole (168 mg, 0.750 mmol) was added, and the mixture was stirred at 90 °C for 47 h. After the mixture was quenched with H<sub>2</sub>O, EtOAc was added, and the mixture was extracted with H<sub>2</sub>O. The aqueous layer was evaporated to give **10b** (121 mg, 0.262 mmol, 35%) as a yellow solid, which was used without any further purification. <sup>1</sup>H NMR (500 MHz, D<sub>2</sub>O): δ<sub>H</sub> 8.68 (1H, s), 8.53 (2H, s), 7.37 (1H, d, *J* = 8.5 Hz), 7.18 (1H, d, *J* = 7.4 Hz), 7.10 (1H, m), 7.01-6.91 (2H, m), 3.32 (2H, m); <sup>13</sup>C NMR (125 MHz, CD<sub>3</sub>OD): δ<sub>C</sub> 137.6, 136.9, 133.9, 126.6, 124.0, 121.9, 121.8, 119.2, 119.0, 116.8, 111.4, 69.7, 26.8; HRESIMS *m/z* 378.9444 [M]<sup>+</sup> (calcd for C<sub>15</sub>H<sub>13</sub>Br<sub>2</sub>N<sub>2</sub>, 378.9440).

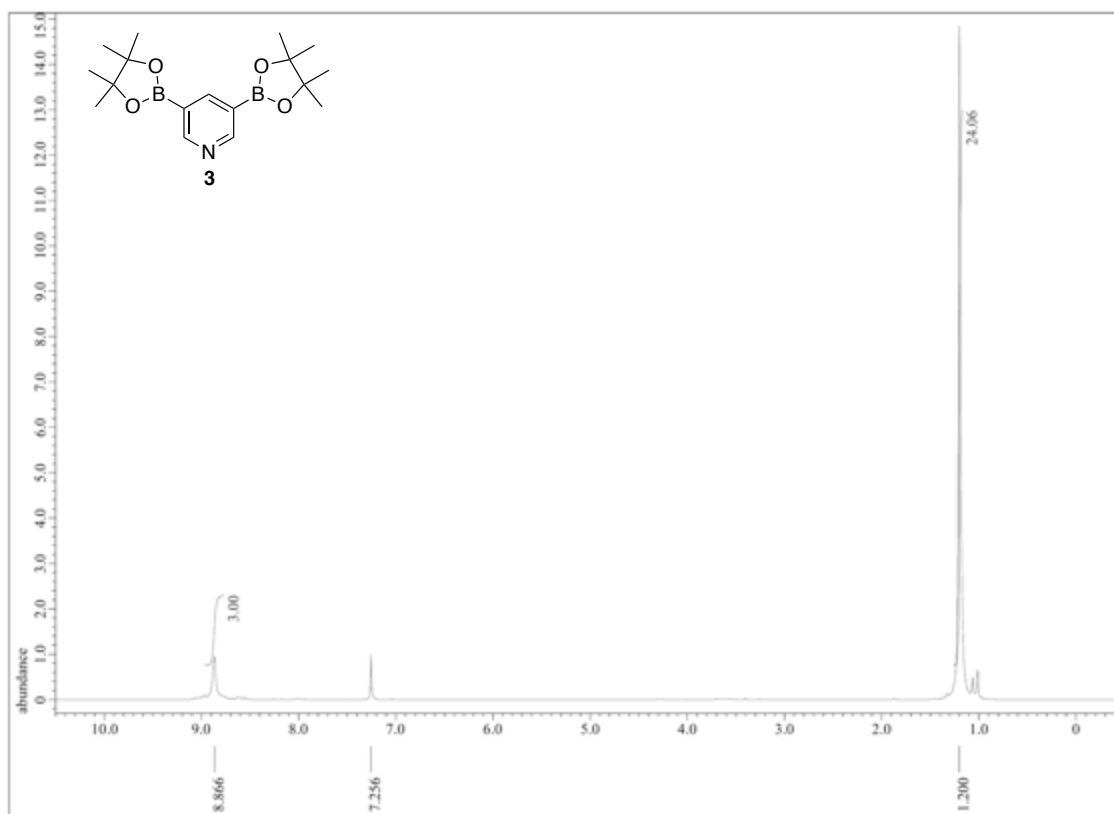

**Figure S5.** <sup>1</sup>H NMR (500 MHz, CDCl<sub>3</sub>) spectrum of **3**.

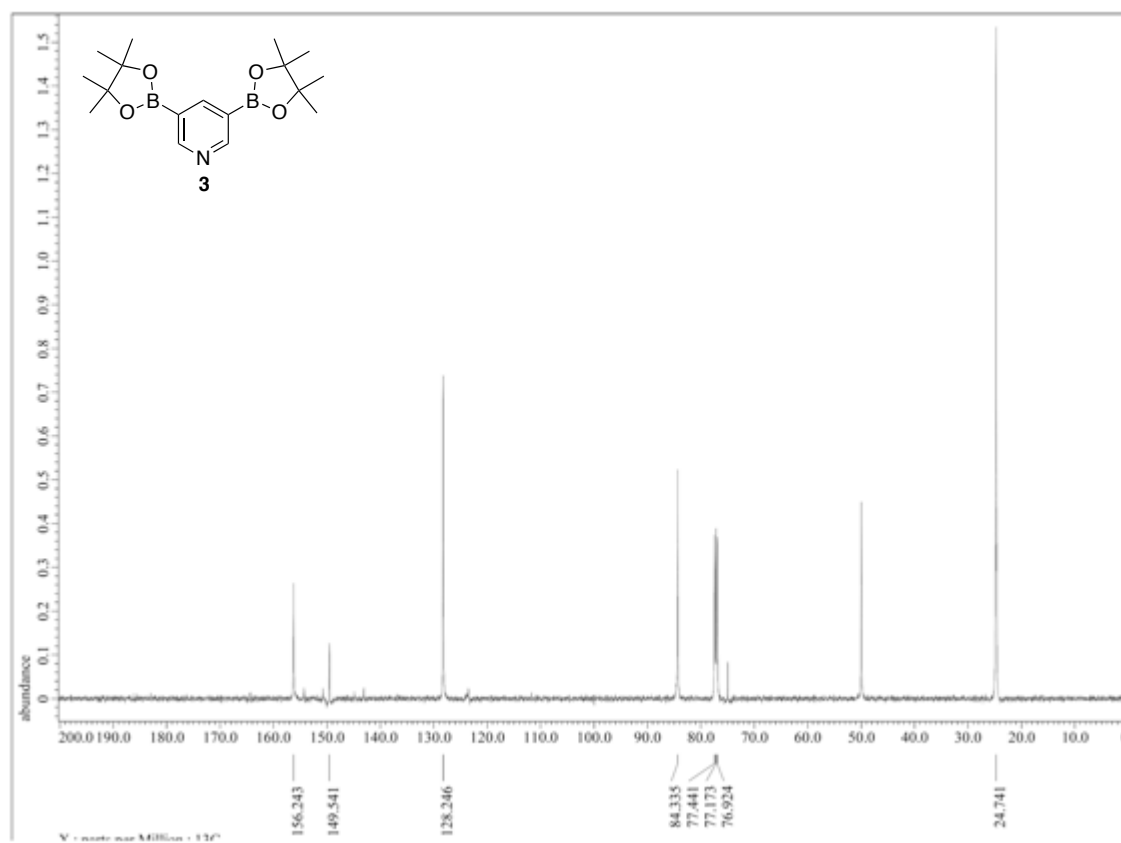

**Figure S6.** <sup>13</sup>C NMR (125 MHz, CDCl<sub>3</sub>) spectrum of **3**.



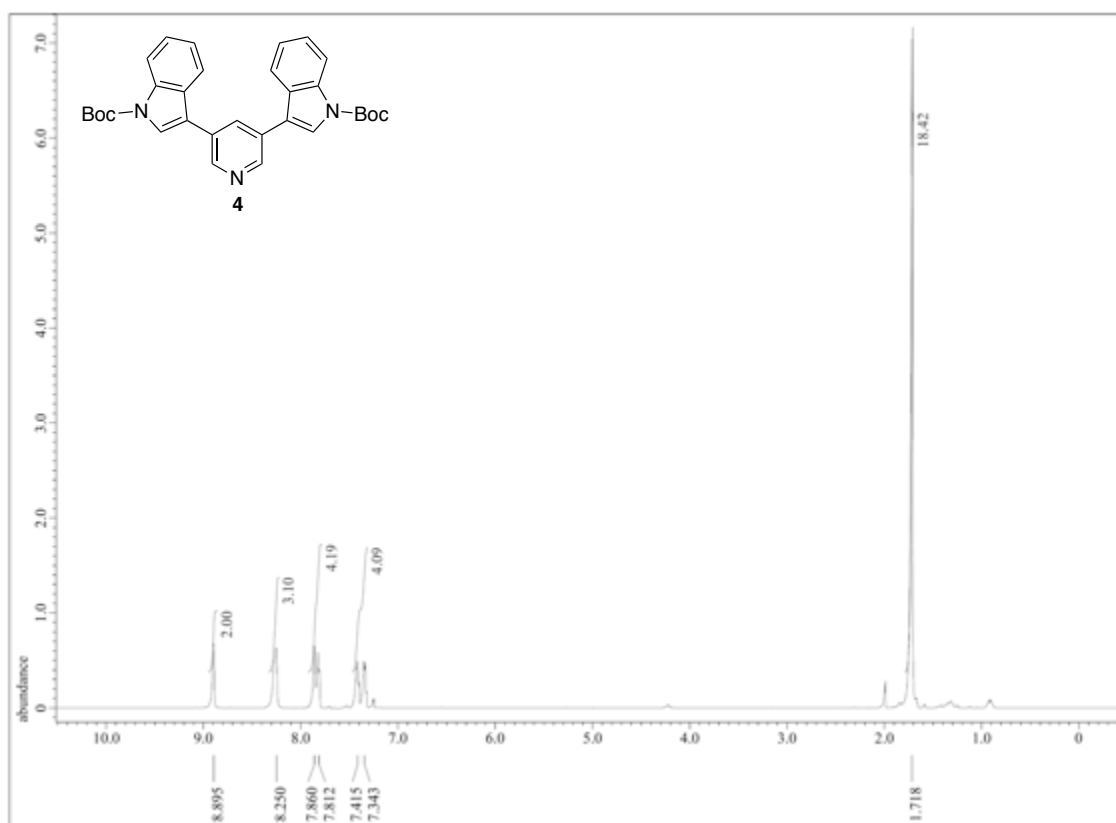

**Figure S7.** <sup>1</sup>H NMR (500 MHz, CDCl<sub>3</sub>) spectrum of **4**.

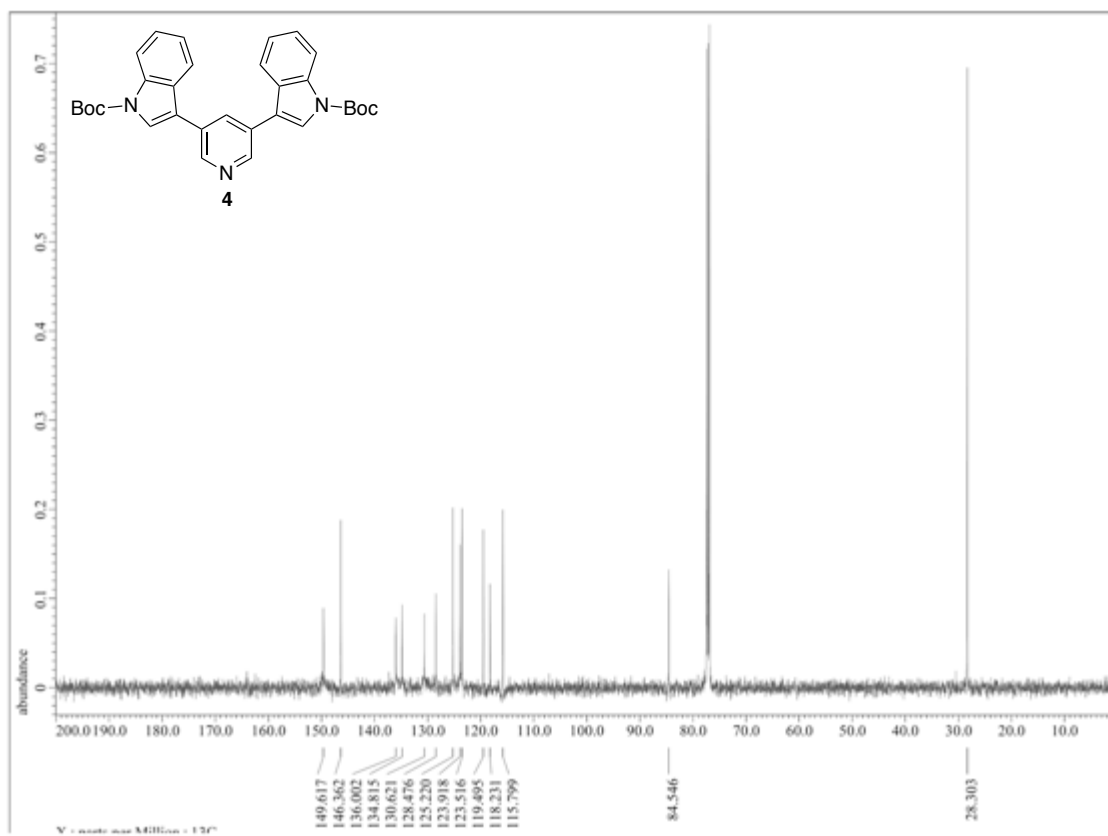

**Figure S8.** <sup>13</sup>C NMR (125 MHz, CDCl<sub>3</sub>) spectrum of **4**.

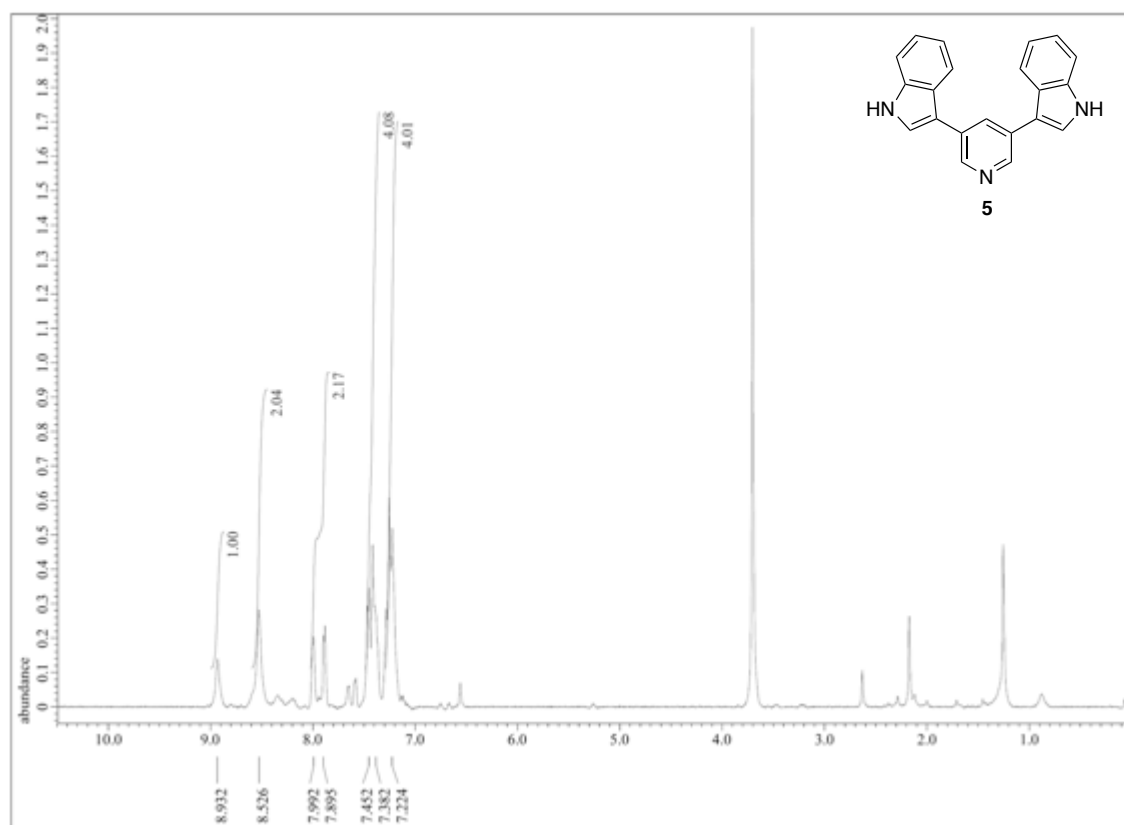

**Figure S9.** <sup>1</sup>H NMR (500 MHz, CDCl<sub>3</sub>) spectrum of **5**.

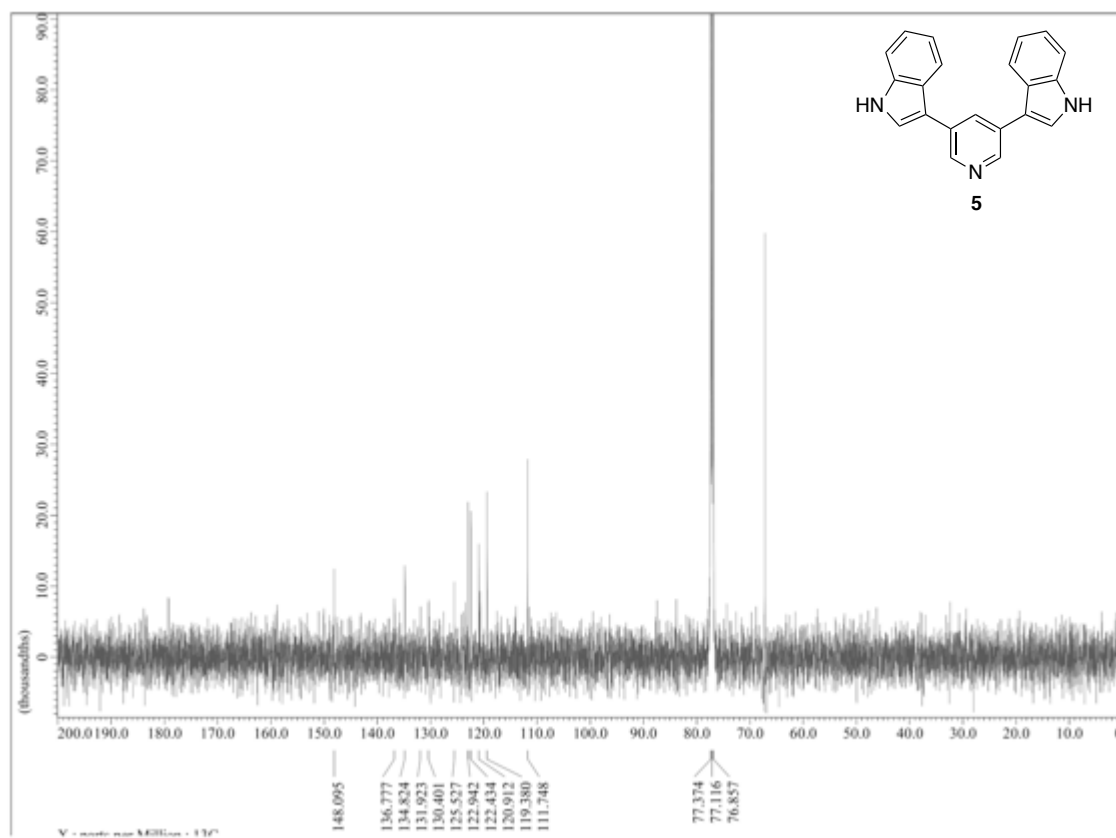

**Figure S10.** <sup>13</sup>C NMR (125 MHz, CDCl<sub>3</sub>) spectrum of **5**.

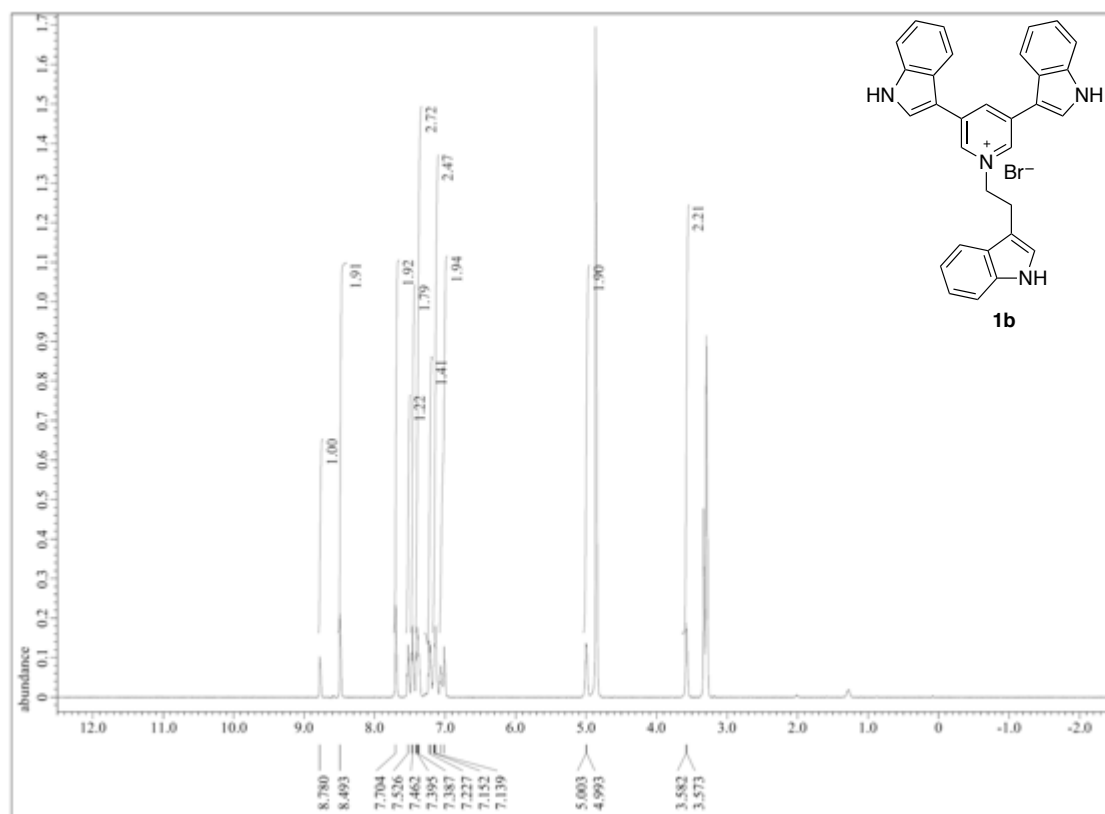

Figure S11. <sup>1</sup>H NMR (500 MHz, CD<sub>3</sub>OD) spectrum of **1b**.

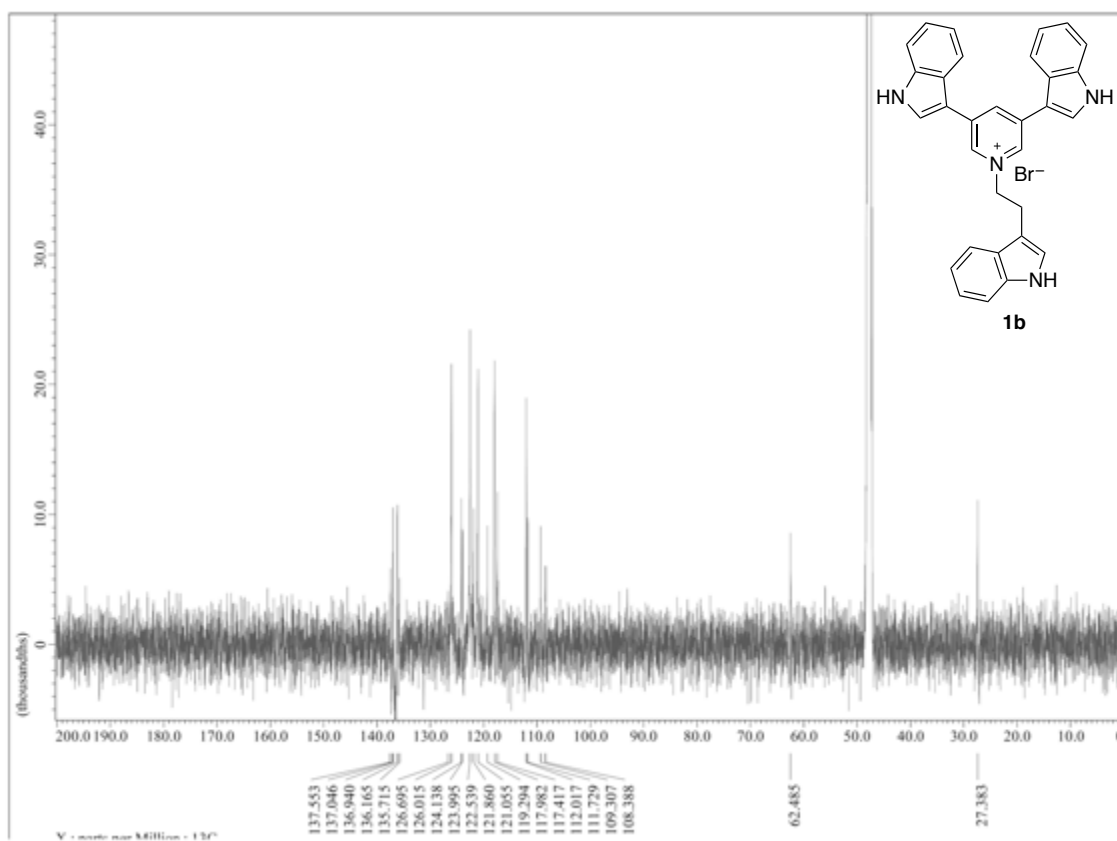

Figure S12. <sup>13</sup>C NMR (125 MHz, CD<sub>3</sub>OD) spectrum of **1b**.

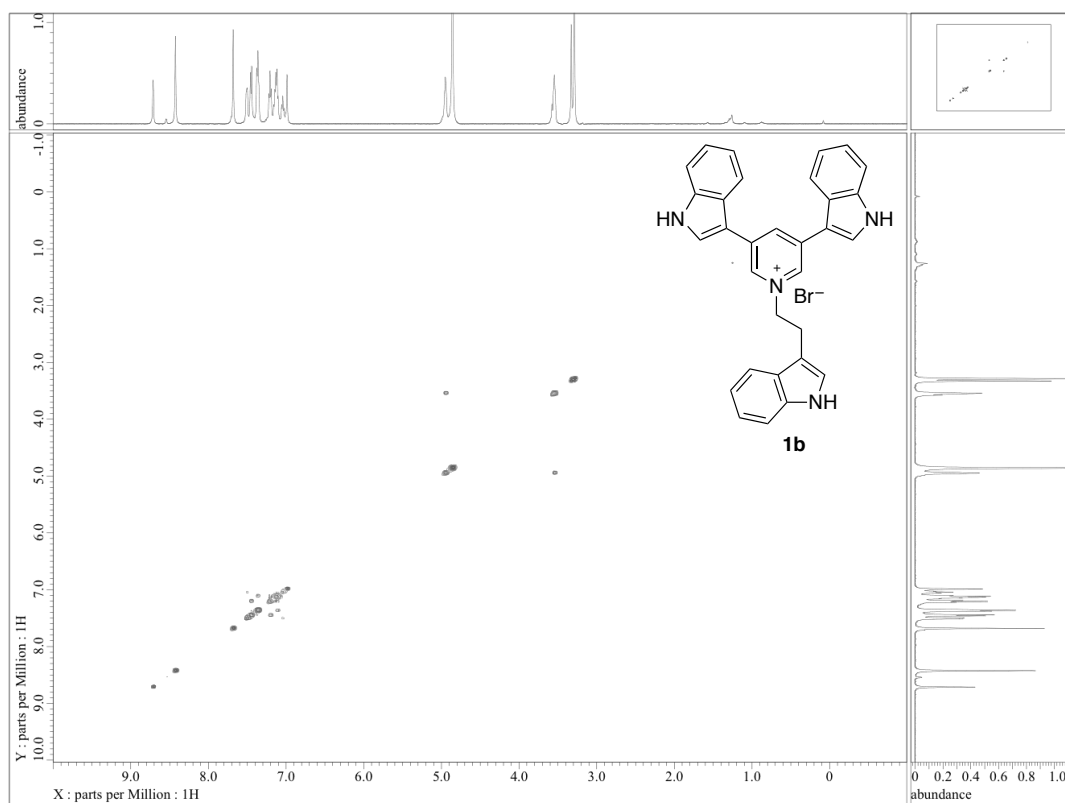

**Figure S13.** COSY (500 MHz, CD<sub>3</sub>OD) spectrum of **1b**.

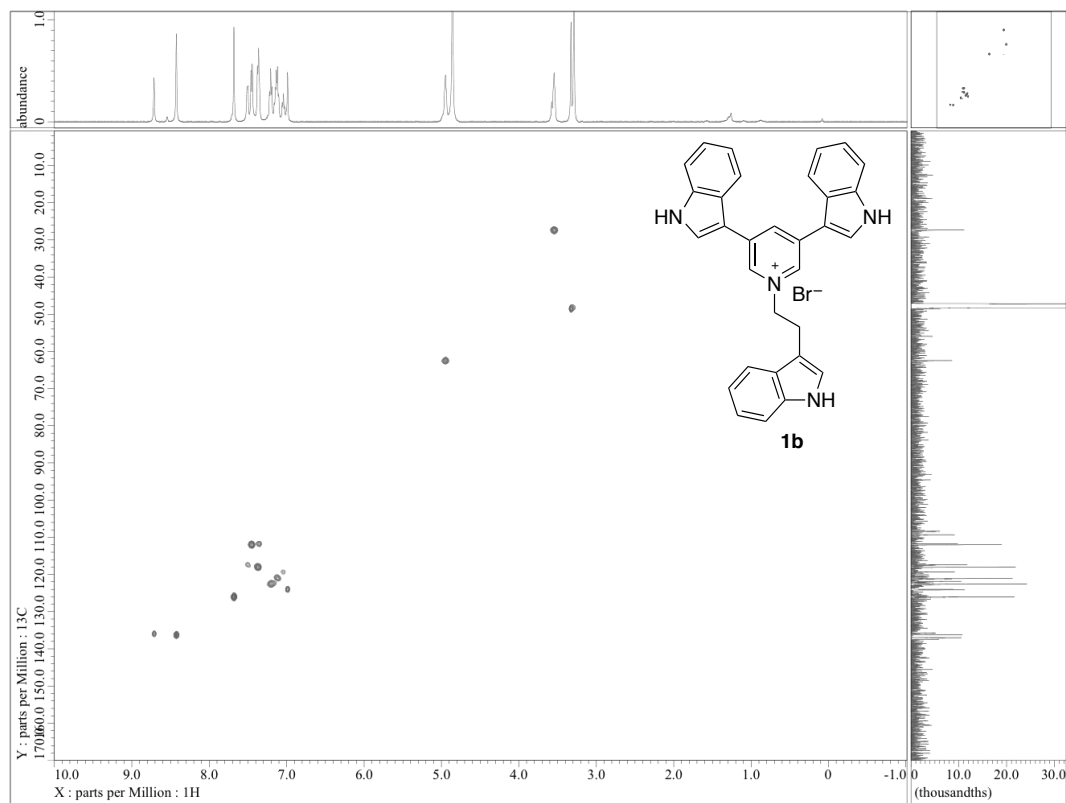

**Figure S14.** HMQC (500 MHz, CD<sub>3</sub>OD) spectrum of **1b**.

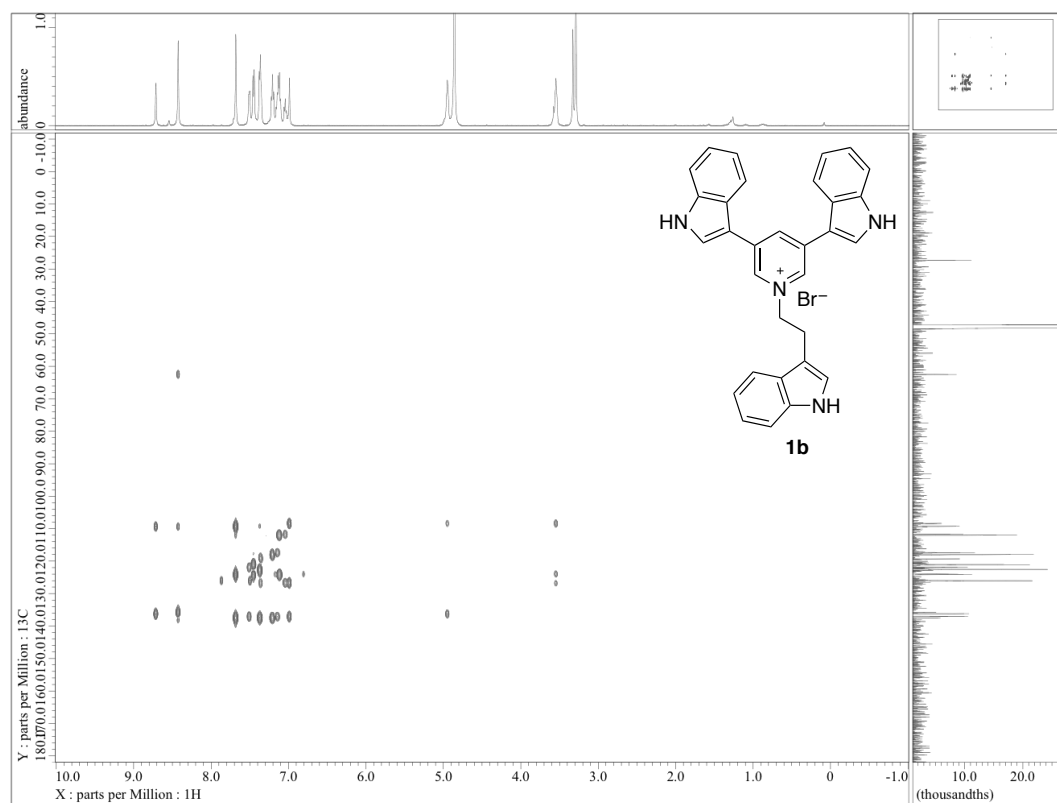

**Figure S15.** HMBC (500 MHz, CD<sub>3</sub>OD) spectrum of **1b**.

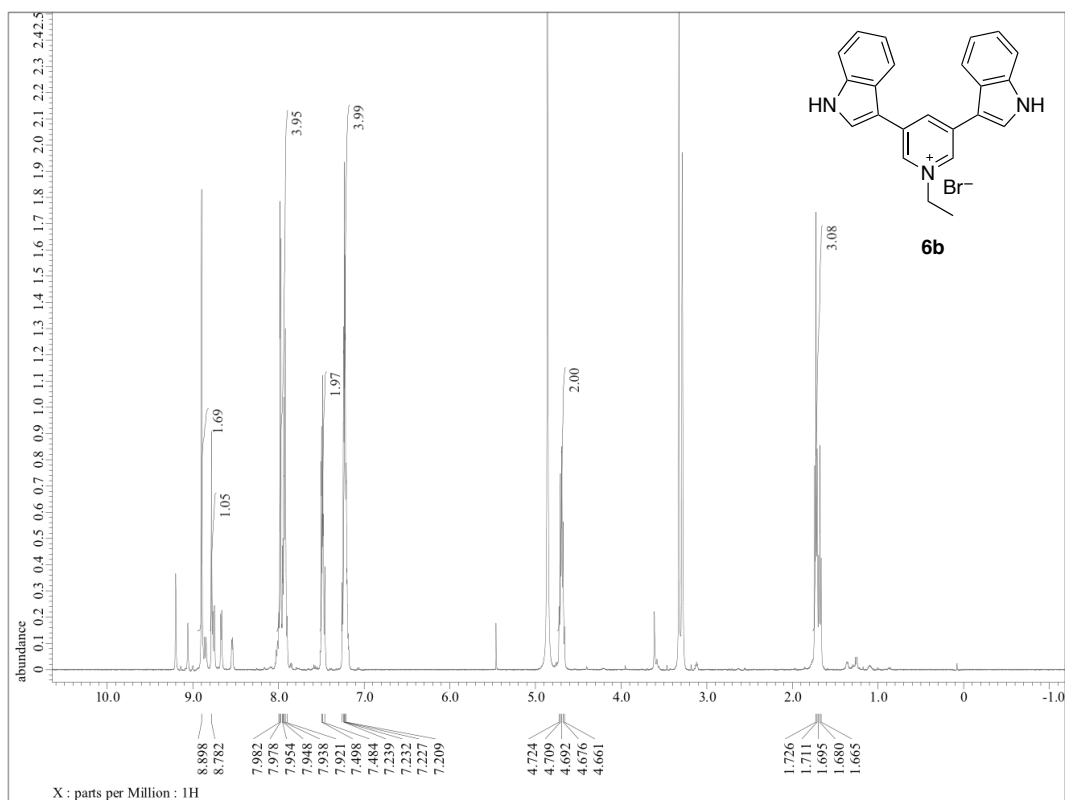

**Figure S16.** <sup>1</sup>H NMR (500 MHz, CD<sub>3</sub>OD) spectrum of **6b**.

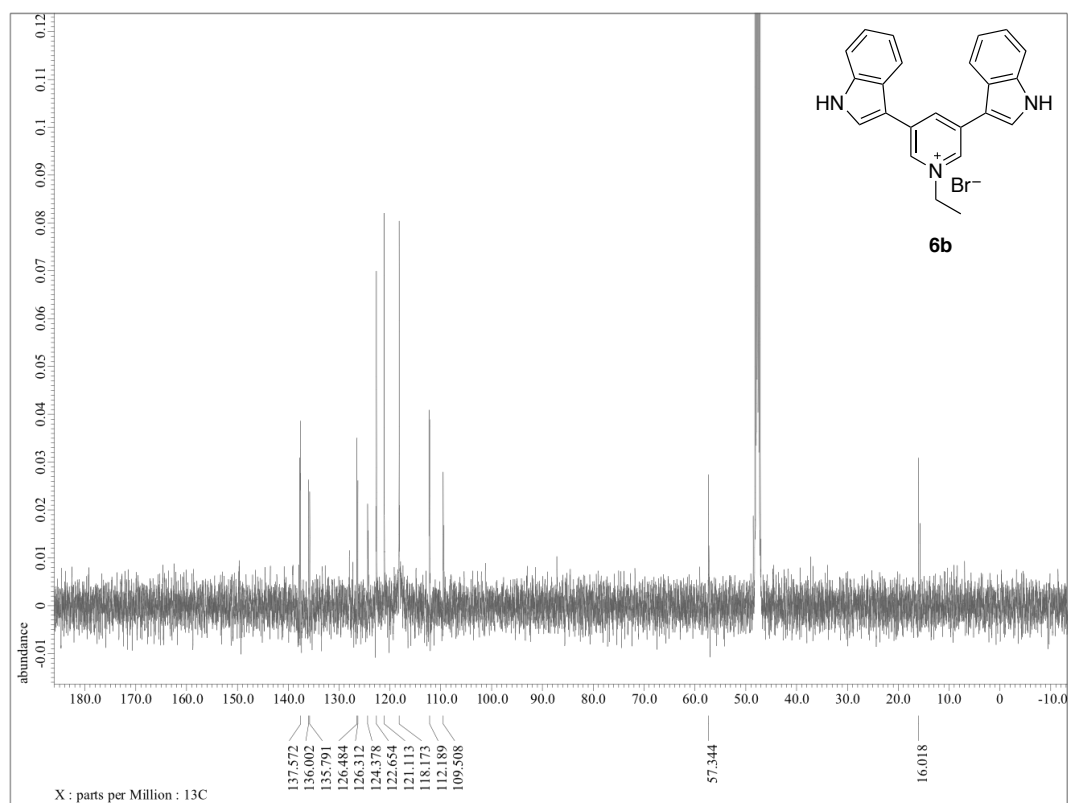

**Figure S17.** <sup>13</sup>C NMR (125 MHz, CD<sub>3</sub>OD) spectrum of **6b**.

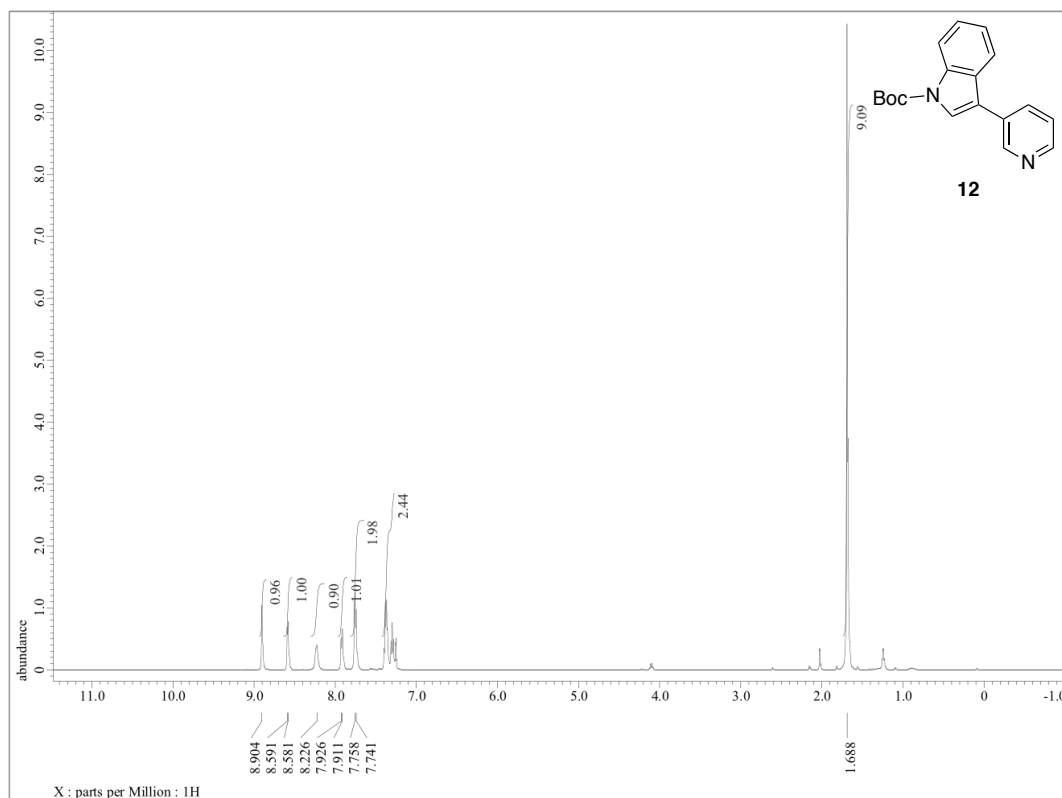

**Figure S18.** <sup>1</sup>H NMR (500 MHz, CDCl<sub>3</sub>) spectrum of **12**.

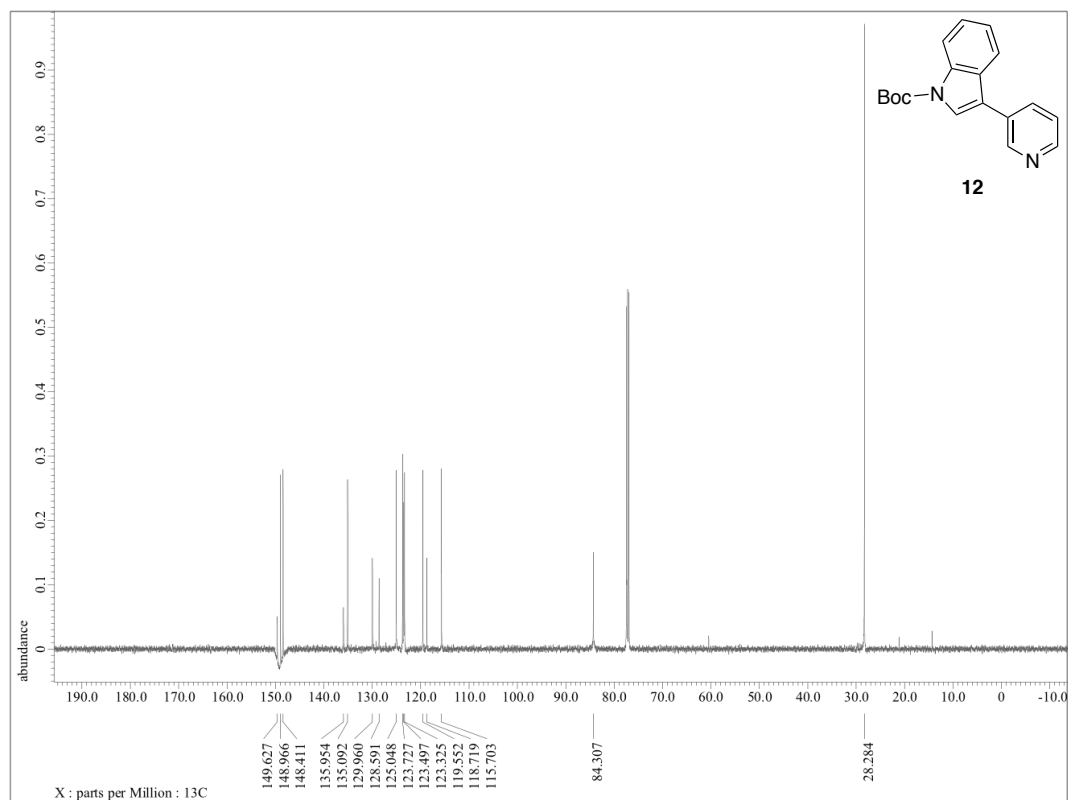

**Figure S19.** <sup>13</sup>C NMR (125 MHz, CDCl<sub>3</sub>) spectrum of **12**.

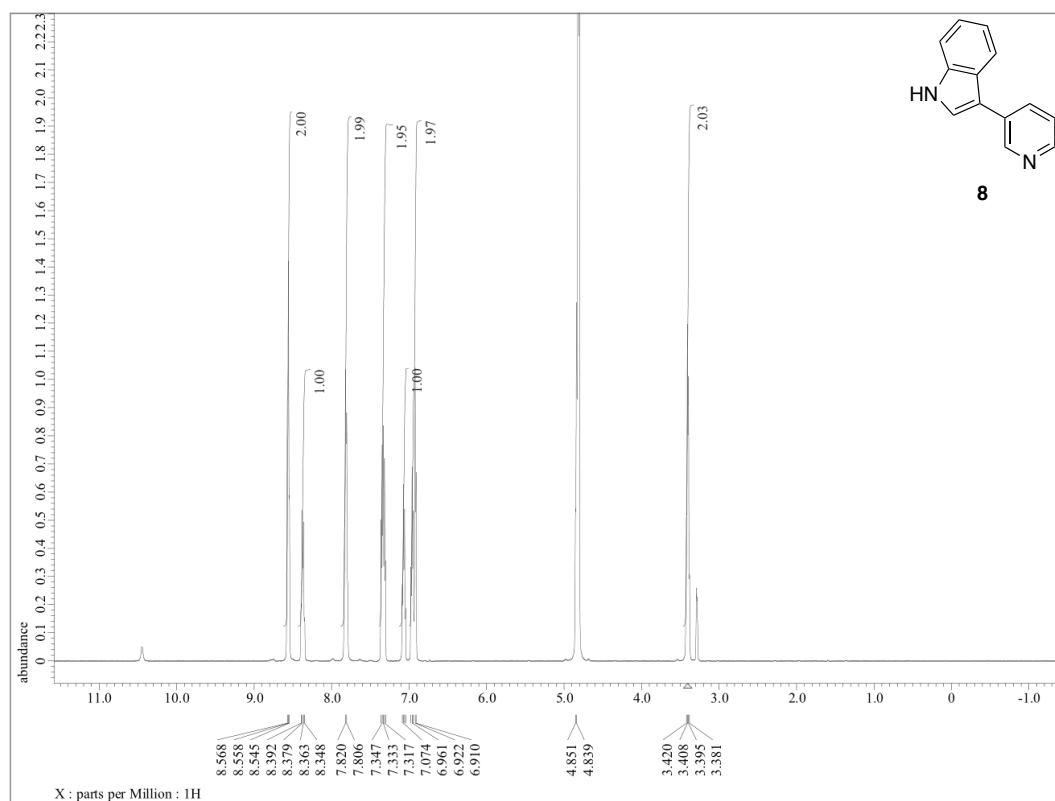

**Figure S20.** <sup>1</sup>H NMR (500 MHz, CD<sub>3</sub>OD) spectrum of **8**.

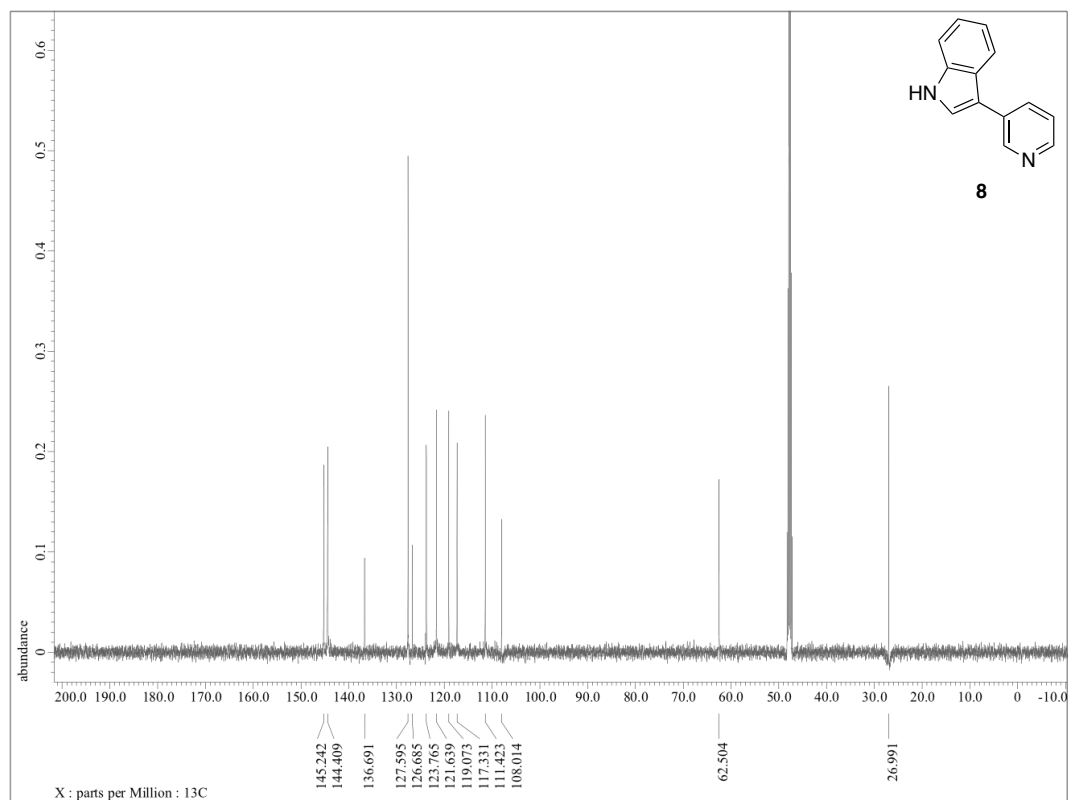

**Figure S21.** <sup>13</sup>C NMR (125 MHz, CD<sub>3</sub>OD) spectrum of **8**.



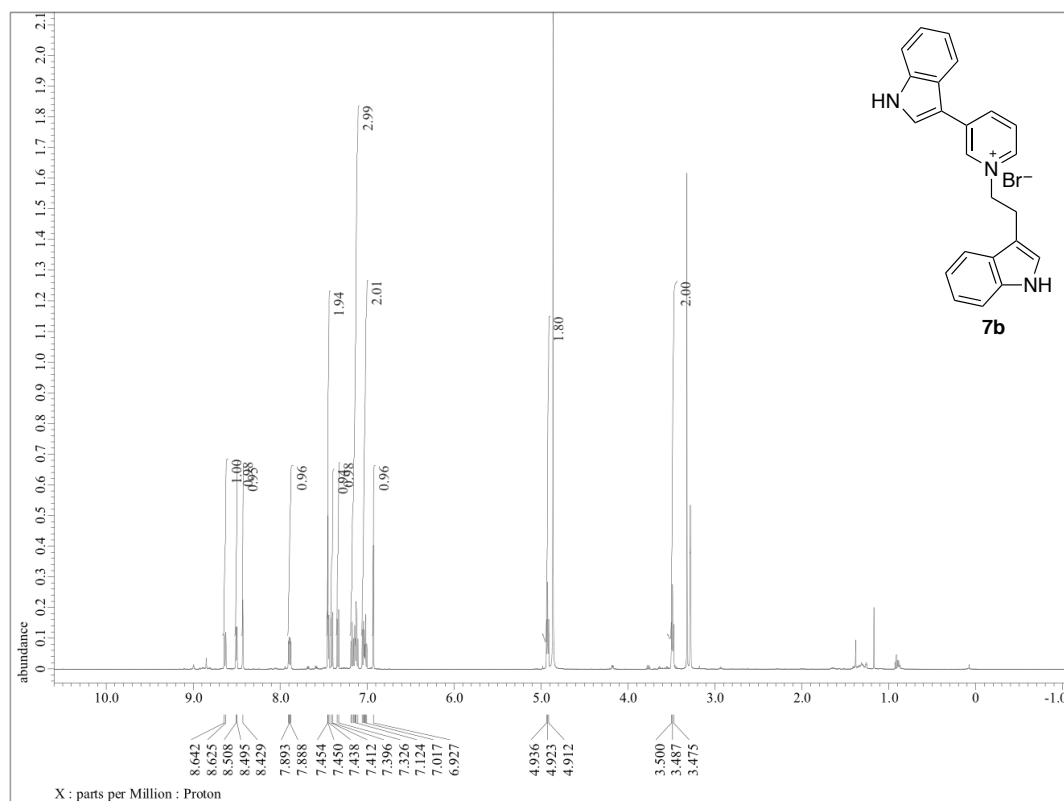

**Figure S22.**  $^1\text{H}$  NMR (500 MHz,  $\text{CD}_3\text{OD}$ ) spectrum of **7b**.

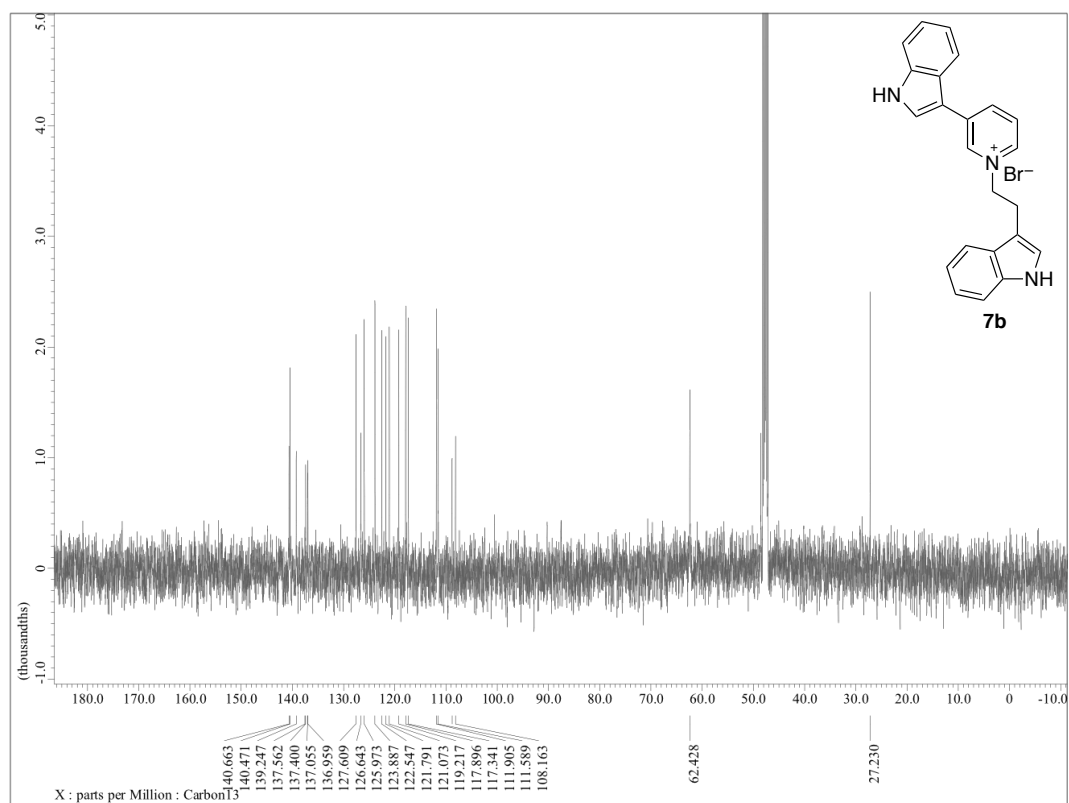

**Figure S23.**  $^{13}\text{C}$  NMR (125 MHz,  $\text{CD}_3\text{OD}$ ) spectrum of **7b**.

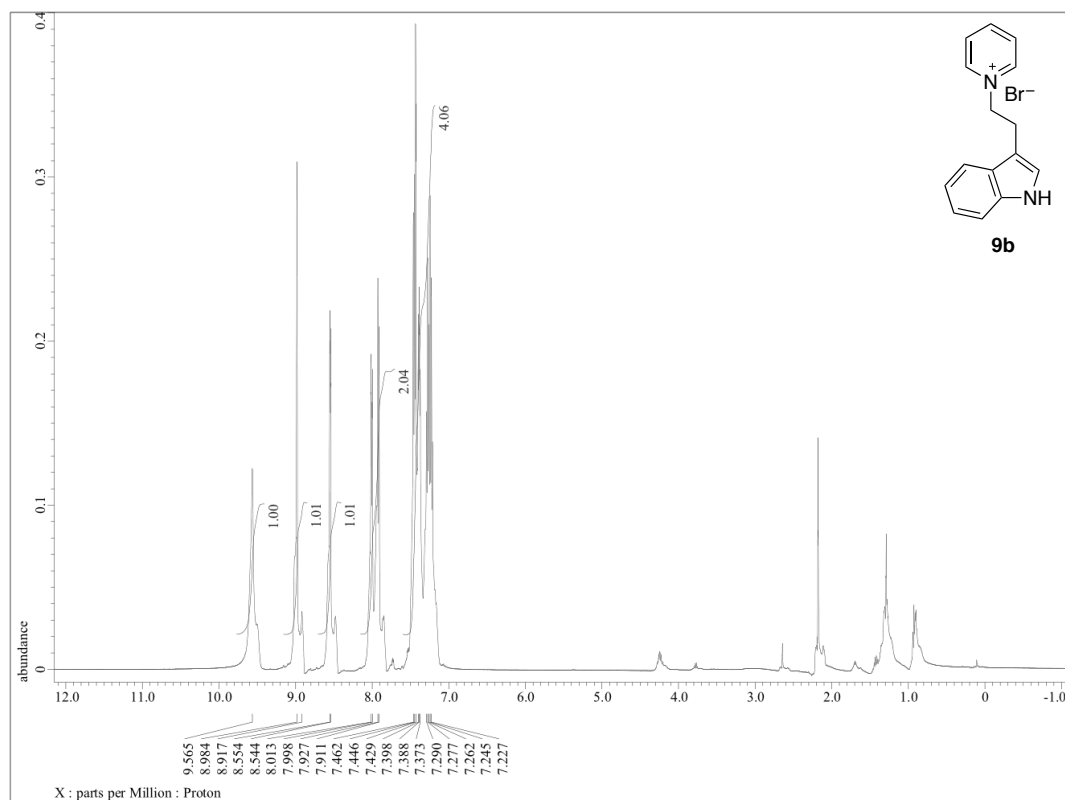

**Figure S24.** <sup>1</sup>H NMR (500 MHz, CDCl<sub>3</sub>) spectrum of **9b**.

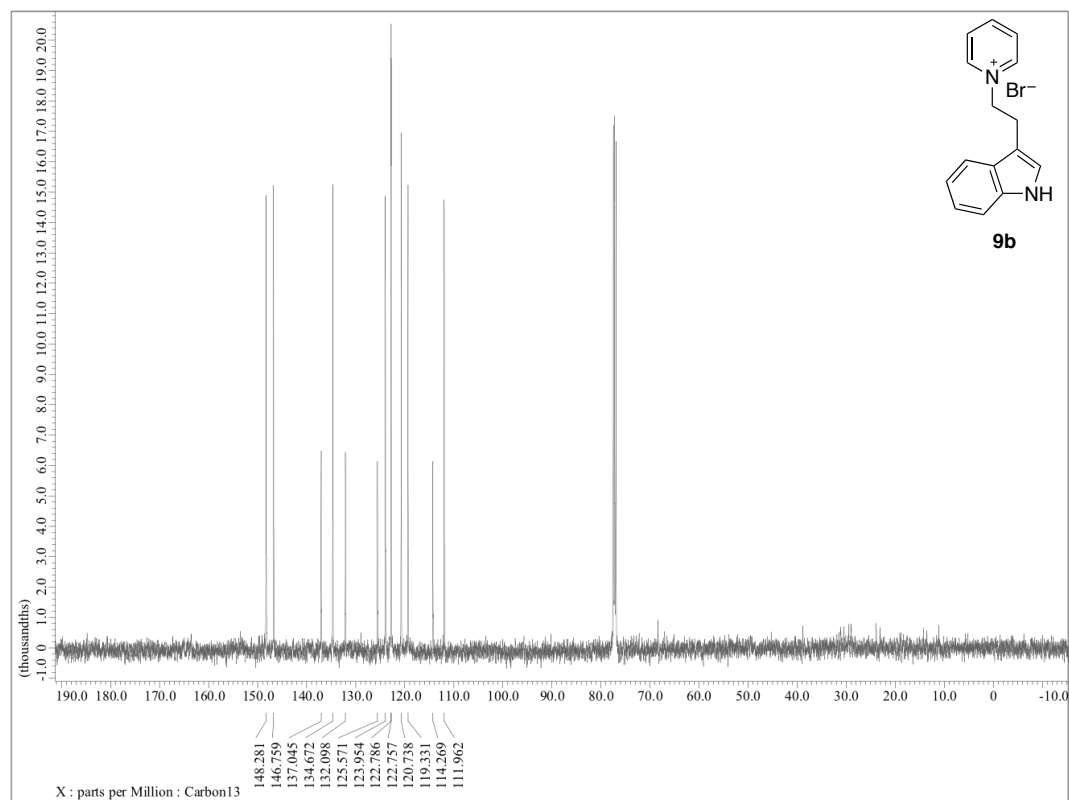

**Figure S25.** <sup>13</sup>C NMR (125 MHz, CDCl<sub>3</sub>) spectrum of **9b**.

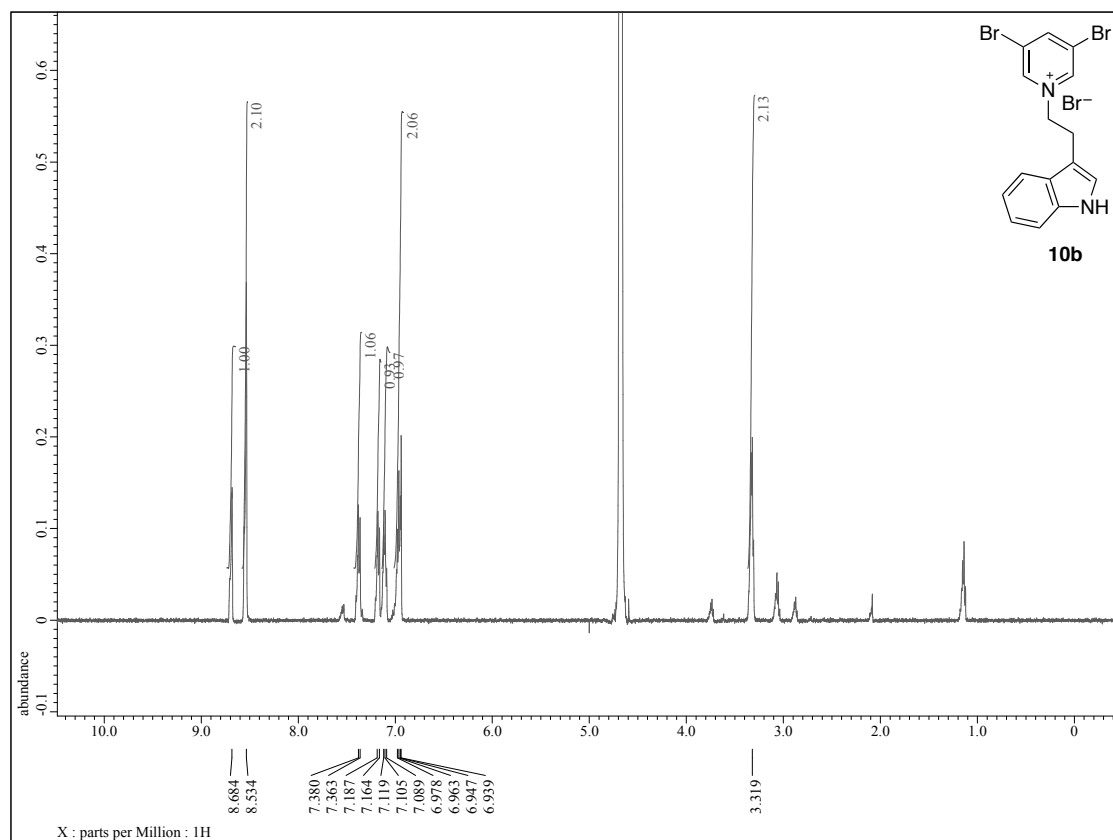

**Figure S26.** <sup>1</sup>H NMR (500 MHz, D<sub>2</sub>O) spectrum of **10b**.

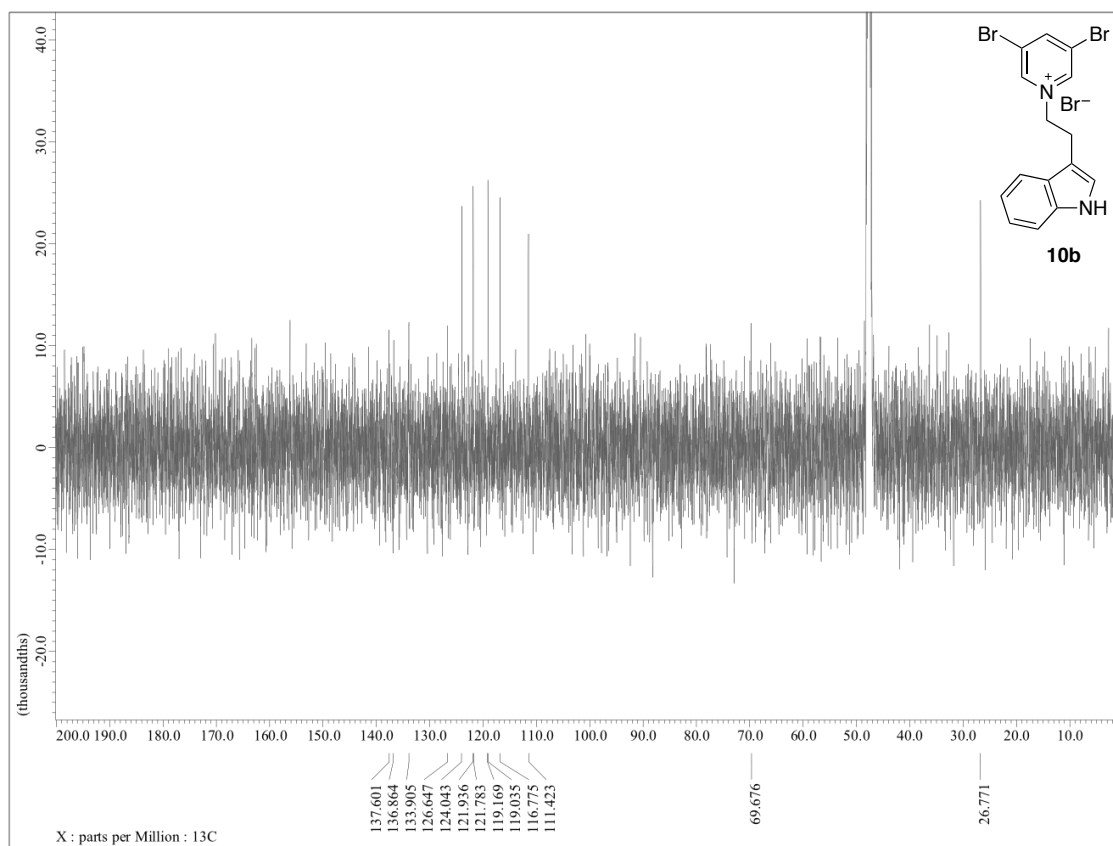

**Figure S27.** <sup>13</sup>C NMR (125 MHz, CD<sub>3</sub>OD) spectrum of **10b**.

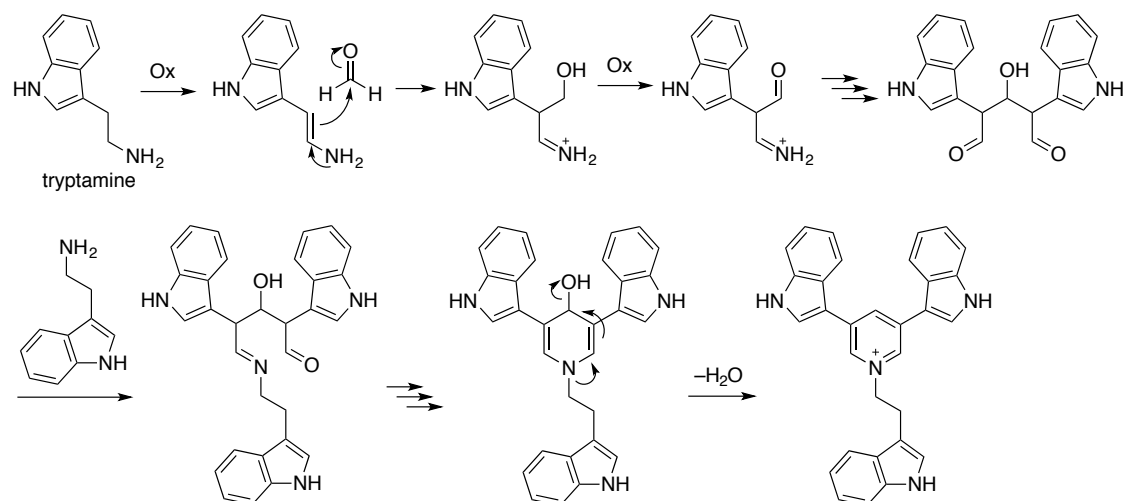

**Scheme S2.** Plausible biosynthetic pathway of tricepyridinium.

**Table S1. Cytotoxic Activities against P388 Cells of Tricepyridinium Bromide and Its Analogs.**

| compound    | IC <sub>50</sub> [μg/mL] (μM) |
|-------------|-------------------------------|
|             | P388 cells                    |
| <b>1b</b>   | 0.53 ± 0.01 (1.0 ± 0.1)       |
| <b>5</b>    | 14 ± 1 (45 ± 3)               |
| <b>6b</b>   | 0.093 ± 0.029 (0.22 ± 0.07)   |
| <b>7b</b>   | 21 ± 1 (50 ± 3)               |
| <b>8</b>    | 1.9 ± 0.2 (10 ± 1)            |
| <b>9b</b>   | 16 ± 1 (53 ± 3)               |
| <b>10b</b>  | 35 ± 5 (76 ± 10)              |
| Doxorubicin | 0.19 ± 0.10 (0.35 ± 0.02)     |
| Cisplatin   | 14 ± 1 (46 ± 4)               |
